# Supplementary material for: A ferrocenyl-terminated dendrimer as an efficient quencher via electron and energy transfer for cathodic electrochemiluminescent bioanalysis
Source: Royal Society of Chemistry journal article supplement (doi:10.1039/c3cc39208b), 2013-01-01
Supplement: c3cc39208b.pdf [file c3cc39208b.pdf]

Electronic Supplementary Information (ESI) for Chemical Communications

This journal is (c) The Royal Society of Chemistry 2012

Ferrocenyl-terminated dendrimer as efficient quencher via  
electron and energy transfer for cathodic  
electrochemiluminescent bioanalysis

Shengyuan Deng, Jianping Lei, Ye Liu, Yin Huang and Huangxian Ju\*

State Key Laboratory of Analytical Chemistry for Life Science, School of Chemistry  
and Chemical Engineering, Nanjing University, Nanjing 210093, P.R. China

**Experimental**

**Materials and reagents.** The *meso*-2,3-dimercaptosuccinic acid (DMSA)-stabilized CdTe quantum dots (QDs) were synthesized using an electrolysis method.<sup>S1</sup> The size and concentration of the QDs were estimated to be 1.3 nm and 10.3  $\mu$ M, respectively. Ferrocenecarboxaldehyde (Fc-CHO),  $\beta$ -cyclodextrin ( $\beta$ -CD), *N*-hydroxysuccinimide (NHS), 1-ethyl-3-(3-dimethylaminopropyl) carbodiimide (EDC), bovine serum albumin (BSA) and polyamidoamine dendrimer (PAMAM, ethylenediamine core, generation 4.0) were purchased from Sigma-Aldrich Chemical Co., Ltd. (USA). Cadmium chloride ( $\text{CdCl}_2 \cdot 2.5\text{H}_2\text{O}$ ) and DMSA were purchased from Alfa Aesar Co., Ltd. (Tianjin, China). Polyethylene glycol (PEG,  $M_w$ : 20000) was obtained from Sinopharm Chemical Reagent Co., Ltd (Shanghai, China). Tellurium rod (4 mm in diameter) was purchased from Leshan Kayada Photoelectricity Co., China. Carcinoembryonic antigen (CEA) standard solution ( $1.0 \text{ mg mL}^{-1}$ ) was supplied by Shanghai Linc-Bio Science Co., Ltd. (Shanghai, China). Mouse monoclonal capture antibody (primary antibody, Ab<sub>1</sub>, clone No. 27D6) and polyclonal signal antibody (secondary antibody, Ab<sub>2</sub>, clone No. 28E4) were purchased from

1 Shuangliu Zhenglong Biochem. Lab (Chengdu, China). 0.1 M phosphate buffer salines (PBS)  
2 with various pHs were prepared by mixing the stock solutions of 0.1 M  $\text{NaH}_2\text{PO}_4$  and 0.1 M  
3  $\text{Na}_2\text{HPO}_4$  containing 0.1 M  $\text{KNO}_3$  as the supporting electrolyte. 0.1 M pH 8.0 PBS was selected  
4 as the default detection solution unless being specified otherwise. The washing buffer was 0.05%  
5 (w/v) Tween-20 (PBST) in 0.01 M pH 7.4 PBS. The blocking solution was 0.01 M pH 7.4 PBS  
6 containing 0.5% (w/v) BSA. The clinical serum samples were fetched from Jiangsu Institute of  
7 Cancer Prevention and Cure. All other reagents were of analytical grade and used as received.  
8 Ultrapure water obtained from a Millipore water purification system ( $\geq 18 \text{ M}\Omega$ , Milli-Q,  
9 Millipore) was used in all assays. The  $\text{N}_2$ -saturated solution was prepared by bubbling highly  
10 pure  $\text{N}_2$  into the solution for 30 min.

11 **Apparatus.** Photoluminescence (PL) and UV-vis absorption spectra were recorded on a RF-5301  
12 PC fluorometer (Shimadzu Co., Japan) and a Shimadzu UV-3600 UV-Vis-NIR  
13 photospectrometer (Shimadzu Co., Japan), respectively. Attenuated total reflection Fourier  
14 transformation infrared (ATR-FTIR) spectra were obtained with a Vector 22 FTIR spectrometer  
15 (Bruker Optics, Germany). X-ray photoelectron spectral (XPS) experiments were operated on an  
16 ESCALAB 250 spectrometer (Thermo-VG Scientific Co., U.S.A.). Tapping mode atomic force  
17 microscopic (AFM) images were acquired under ambient conditions by directly casting sample  
18 dispersions onto freshly cleaved mica sheets using an Agilent 5500 AFM/SPM system (U.S.A.)  
19 with Picoscan v5.3.3 software. The occupied volumes of (accessible) solvent surface and Van de  
20 Waals surface were calculated with the dendrimer package of Materials Studio 5.0 (Accelrys  
21 Software Inc., U.S.A.). Cyclic voltammetric (CV) experiments were performed on a CHI 812B  
22 electrochemical workstation (Shanghai Chenhua Instruments Co., China), and  
23 electrochemiluminescent (ECL) measurements were carried out on a MPI-E multifunctional

electrochemical and chemiluminescent analytical system (Xi'an Remex Analytical Instrument Co., Ltd. China) with a modified glassy carbon electrode (GCE, 5 mm in diameter) as working, a platinum wire as auxiliary and a Ag/AgCl (saturated KCl) as reference electrodes. The ECL cell was self-made with three side necks and one middle neck. The reference and counter electrodes were placed into two side necks, while the modified GCE was put in the middle neck with its electrode surface downward approximating the optical window for recording the ECL signal. The ECL emission window was put in front of the photomultiplier tube (PMT, detection range from 300 to 650 nm) biased at  $-1000$  V. Unless specifically mentioned, the scan rate was  $100$  mV s $^{-1}$ . The reference levels of CEA in human serum samples were detected with an automated electrochemiluminescent analyzer (Elecsys 2010, Roche).

**Preparation of Fc-incorporated PAMAM framework (Fc@PAMAM).** Surface primary amine of NH $_2$ -terminated PAMAM was partially modified with ferrocenyl group through the amine-aldehyde reaction with the Schiff base as intermediate (Scheme S1, steps *a* and *b*).<sup>S2</sup> Typically, Fc-CHO (7.5 mg) in 3.75 mL methanol was added dropwise to 0.25 mL of 10% (w/v) dendrimer solution containing 16% anhydrous CH $_3$ COOH as the catalyst. The mixture was mildly vortexed for 10 h at 36 °C, which showed a color change from orange to dark brown. Free Fc-CHO and excessive acid were removed by ultrafiltration (molecular weight cut-off: 30 kDa) at 14000 *rcf* for 10 min. The concentrated product was collected at 2000 *rcf* for 5 min, and then redispersed and purified by thrice washing with methanol to obtain 5 mL solution. Subsequently, 1 mL of 20 mg NaBH $_4$  was quickly added into the solution with vigorous vortex at room temperature for 2 h to reduce the imine-forming double-bond. The ultrafiltration and condensation process was repeated in succession for 4-5 times. Finally, the product was dried at 40 °C overnight in vacuum to vaporize the residual methanol.

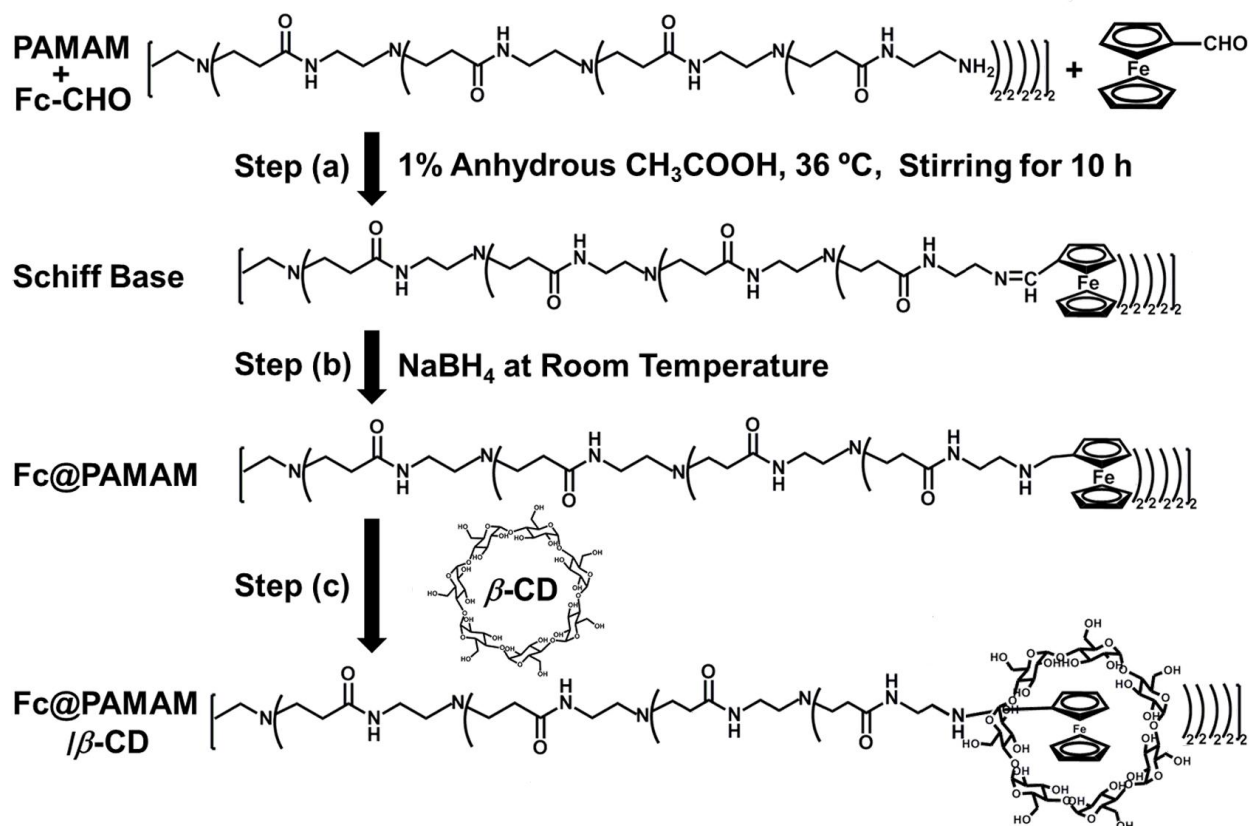

**Scheme S1** Synthesis of Fc@PAMAM organometallic framework complex (steps *a* and *b*) and host-guest intramolecular incorporation of Fc@PAMAM into  $\beta$ -CD (step *c*).

**Inclusion of Fc group by  $\beta$ -CD.** 500  $\mu\text{L}$  of 1 mM  $\beta$ -CD dissolved in 0.1 M NaOH was mixed with 500  $\mu\text{L}$  of 100  $\mu\text{M}$  Fc@PAMAM and mildly vortexed at ambient condition for 1 h followed by ultrafiltration at 2000 *rcf* for 10 min and washed thrice with ultrapure water. After host-guest interaction of Fc@PAMAM with  $\beta$ -CD (Scheme S1, step *c*), the resulting solution was cast on GCE for electrochemical investigation.

**Preparation of Fc@PAMAM-labeled Ab<sub>2</sub> (Ab<sub>2</sub>-Fc@PAMAM).** 100  $\mu\text{M}$  Fc@PAMAM in 500  $\mu\text{L}$  of 10 mM pH 6.5 MES was mixed with 10  $\mu\text{L}$  of 10  $\mu\text{g mL}^{-1}$  Ab<sub>2</sub>, 100 mM EDC and 400 mM NHS by mild vortex for 5 min. The suspension was centrifuged at 8000 *rcf* for 10 min by decanting the white floccus and supernatant and twice washed with PBST and ultrapure water to

1 obtain Ab<sub>2</sub>-Fc@PAMAM, which was stored at 4 °C and diluted to 200 µL with ultrapure water  
2 prior to use.

3 **Preparation and measurement procedure of ECL immunosensor.** A GCE was polished to  
4 mirror using 0.3 and 0.05 µm alumina slurry (Beuhler) followed by sonication in ethanol and  
5 water. After the electrode was rinsed with water and allowed to dry in N<sub>2</sub> atmosphere, 20 µL of  
6 DMSA-CdTe QDs solution was dropped onto the surface. After dried in air at room temperature,  
7 20 µL of 2.0 mg mL<sup>-1</sup> PEG aqueous solution was dropped onto the QDs film. The electrode was  
8 incubated in a 100% moisture-saturated environment at room temperature overnight to passively  
9 adsorb PEG polymer. Following a slow wash with stream of ultrapure water, 20 µL of 50 µg  
10 mL<sup>-1</sup> Ab<sub>1</sub> in 10 mM pH 7.4 PBS was dropped on the PEG/QDs modified GCE and incubated for  
11 2 h at 36 °C. Then, the electrode was washed with water and incubated with 20 µL of 0.5% BSA  
12 (w/v) in 10 mM pH 7.4 PBS for 1 h to block possible remaining active sites against nonspecific  
13 adsorption. Finally, the immunosensor was rinsed with water and stored at 4 °C prior to use.

14 For sandwich-type immunoassay, the immunosensor was incubated with 20 µL of CEA  
15 standard solution or serum sample for 40 min at 36 °C. After a washing step, 20 µL of Ab<sub>2</sub>-  
16 Fc@PAMAM was cast upon the immunosensor for 120-min incubation at 36 °C, followed by  
17 washing again. Finally, the ECL signal was detected in air-saturated 0.1 M pH 9.0 PBS  
18 containing 0.1 M KNO<sub>3</sub>.

19

# 1 AFM characterization

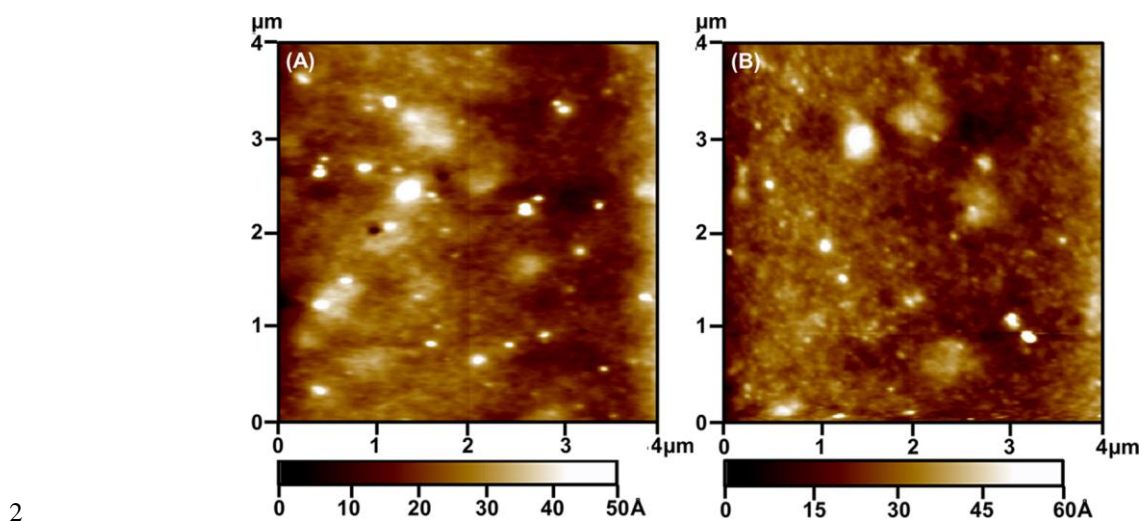

3 **Fig. S1** AFM topographic images of (A) PAMAM and (B) Fc@PAMAM.

# 4 CV characterization of Fc@PAMAM modified GCE

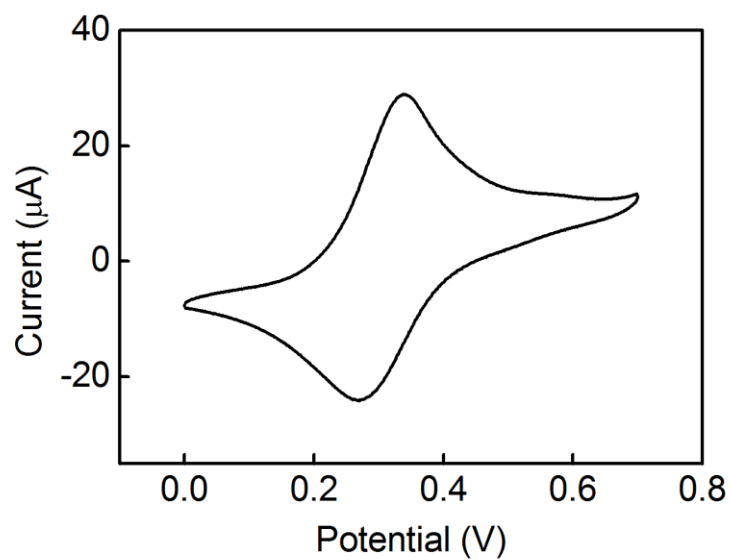

6 **Fig. S2** CV plot of Fc@PAMAM modified GCE in 0.1 M pH 8.0 PBS.

## Quenching mechanism of Fc@PAMAM on cathodic QDs-based ECL

Similar to the mechanism for quenching effect of Fc on the Ru(bpy)<sub>3</sub><sup>2+</sup>-based ECL system,<sup>S3</sup> the quenching effect of Fc@PAMAM on the cathodic ECL at QDs modified electrode could be partly attributed to the energy transfer from excited QDs (QD\*) to the cyclopentadiene of Fc in Fc@PAMAM. At the same time, during the cathodic scan, the reduced QDs (QD<sup>•-</sup>) could transfer electron to the oxidation product of Fc@PAMAM, which prohibited the formation of QD\*, and thus quenched the ECL emission. The electron transfer process could be expressed as follows:

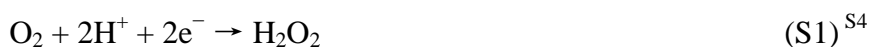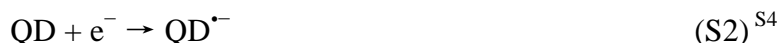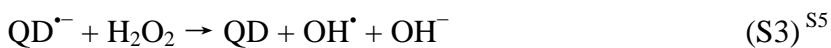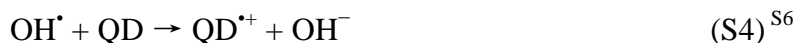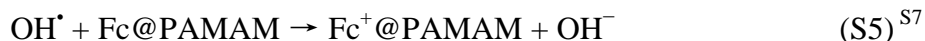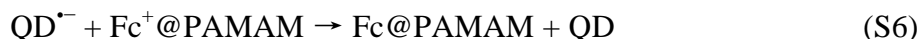

The Fc@PAMAM not only consumed OH<sup>•</sup> (Eq. S5), which was an important species for the formation of hole-injected QDs, its oxidation product could also act as an efficient electron scavenger to oxidize the electron-injected QDs (QD<sup>•-</sup>) (Eq. S6), leading to great decrease of excited states (QD\*). Thus the quenching effect of Fc@PAMAM on the cathodic QDs-based ECL contained both energy and electron transfer. The dual quenching effect greatly improved the sensitivity for bioanalysis.

## Optimization of detection conditions

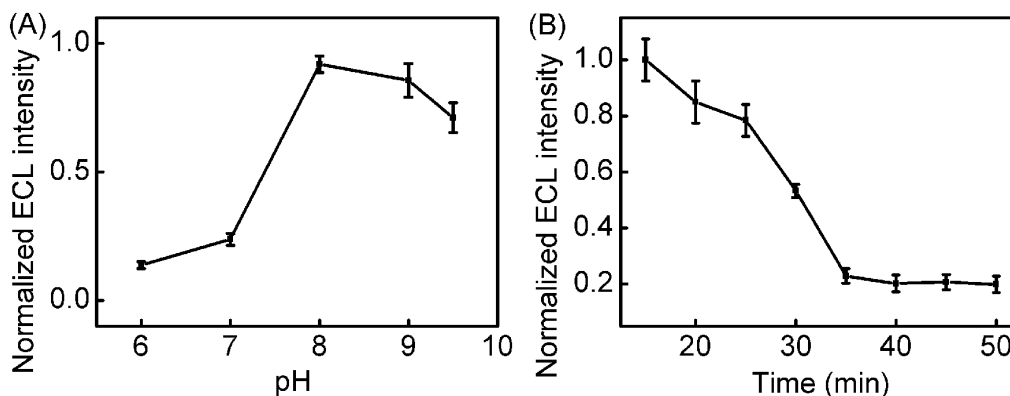

**Fig. S3** Effects of (A) buffer pH and (B) incubation time of CEA on ECL intensity.

0.1 M pH 8.0 PBS and the incubation time of 35 min for CEA capture are the optimal detection conditions.

## Reproducibility, stability and sample detection

The intra-assay and inter-assay precisions of the ECL immunosensor were examined by detecting the ECL emission at  $0.5 \text{ ng mL}^{-1}$  CEA. The relative standard deviation (RSD) for five measurements of CEA with the same immunosensor was 8.9%, while the RSD for five parallel measurements with five immunosensors was 11.4%, indicating good precision of the immunoassay method and acceptable fabrication reproducibility of the immunosensors. Eight measurements of ECL emission upon continuous cyclic scans of the ECL immunosensor at  $0.5 \text{ ng mL}^{-1}$  CEA showed coincident signal with RSD of 3.5%, indicating acceptable reliability and stability of the detection signal.

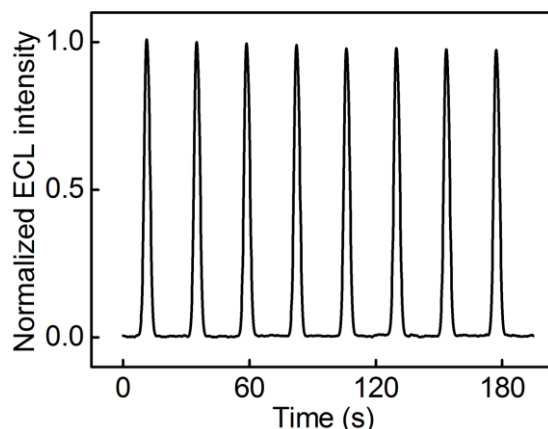

**Fig. S4** Continuous cyclic scans of the immunosensor in air-saturated detection solution after incubation with  $0.5 \text{ ng mL}^{-1}$  of CEA and then  $\text{Ab}_2\text{-Fc@PAMAM}$ .

**Table S1. Assay results of CEA ( $\text{ng mL}^{-1}$ ) in clinical serum samples using the proposed and reference methods.**

| Sample No.         | 1     | 2    | 3    |
|--------------------|-------|------|------|
| Proposed method    | 3.19  | 2.44 | 2.31 |
| Reference method   | 3.55  | 2.62 | 2.09 |
| Relative error (%) | -10.1 | -6.9 | 10.5 |

## References

- S1. C. W. Ge, M. Xu, J. Liu, J. P. Lei, H. X. Ju, *Chem. Commun.* **2008**, 4, 450–452.
- S2. J. Das, K. Jo, J. W. Lee, H. Yang, *Anal. Chem.* **2007**, 79, 2790–2796.
- S3. W. D. Cao, J. P. Ferrance, J. Demas and J. P. Landers, *J. Am. Chem. Soc.* **2006**, 128, 7572–7578.
- S4. X. Liu, L. X. Cheng, J. P. Lei, H. Liu and H. X. Ju, *Chem. Eur. J.* **2010**, 16, 10764–10770.
- S5. J. Weiss, *Adv. Catal.* **1952**, 4, 343–364.
- S6. S. K. Poznyak, D. V. Talapin, E. V. Shevchenko, H. Weller, *Nano Lett.* **2004**, 4, 693–698.
- S7. A. H. Wu, J. J. Sun, R. J. Zheng, H. H. Yang and G. N. Chen, *Talanta* **2010**, 81, 934–940.
